# Supplementary material
Source: Elsevier journal article supplement (https://www.researchgate.net/publication/331514421_Document_S1_Figures_S1-S3_and_Table_S1/data/5c7dc7e9458515831f83d9a0/mmc1.pdf?origin=scientificContributions)
Supplement: mmc1 [file mmc1.pdf]

**OMTM, Volume 13**

**Supplemental Information**

**Induction of Expandable Tissue-Specific  
Progenitor Cells from Human Pancreatic Tissue  
through Transient Expression of Defined Factors**

**Hirofumi Noguchi, Chika Miyagi-Shiohira, Yoshiki Nakashima, Takao Kinjo, Naoya Kobayashi, Issei Saitoh, Masami Watanabe, A. M. James Shapiro, and Tatsuya Kin**

**A**

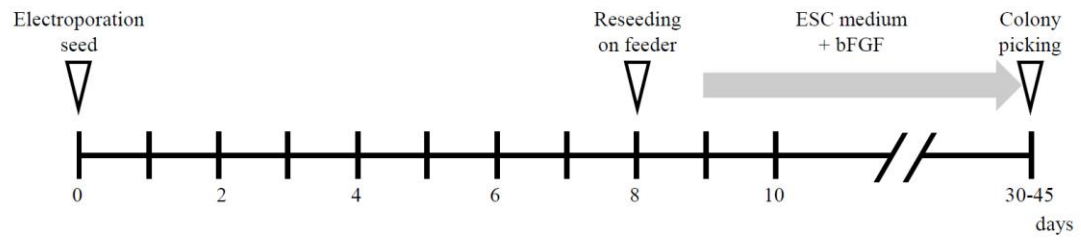

**B**

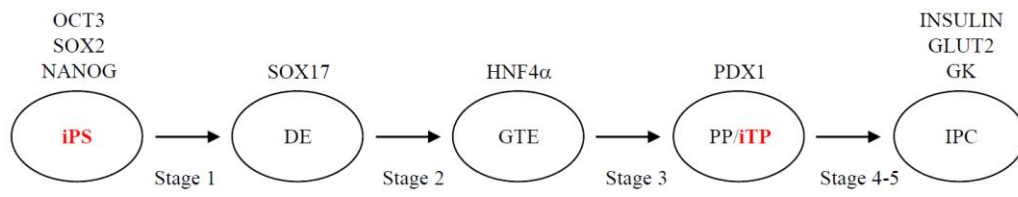

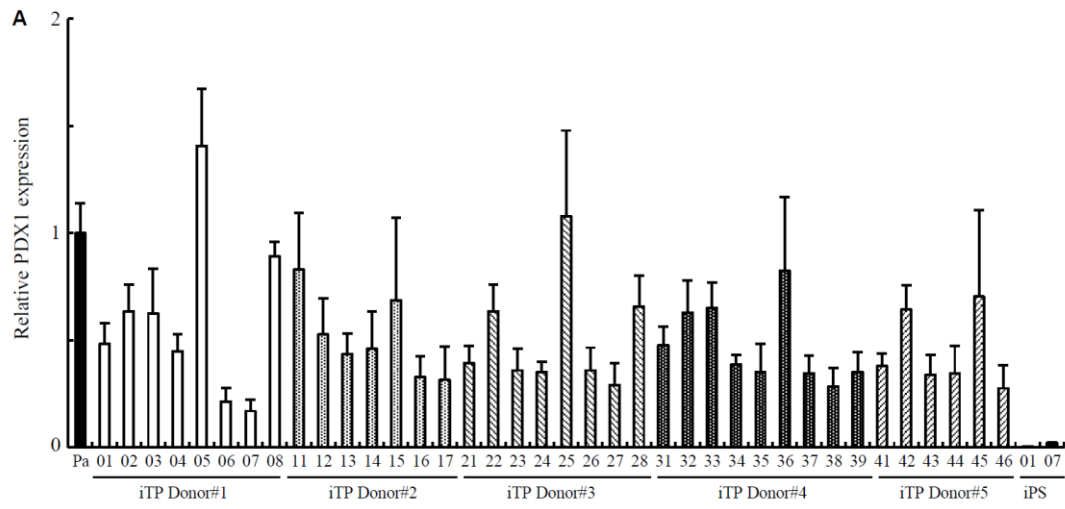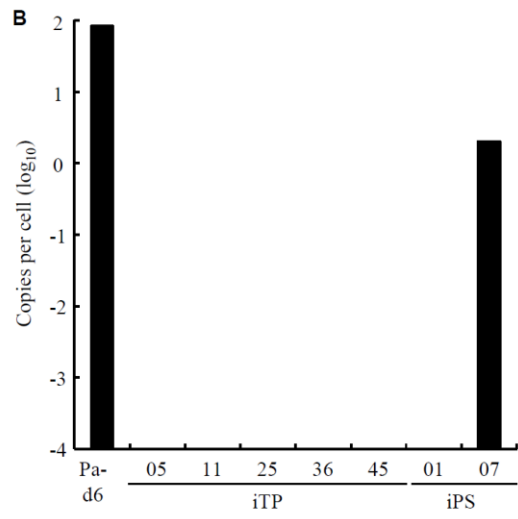

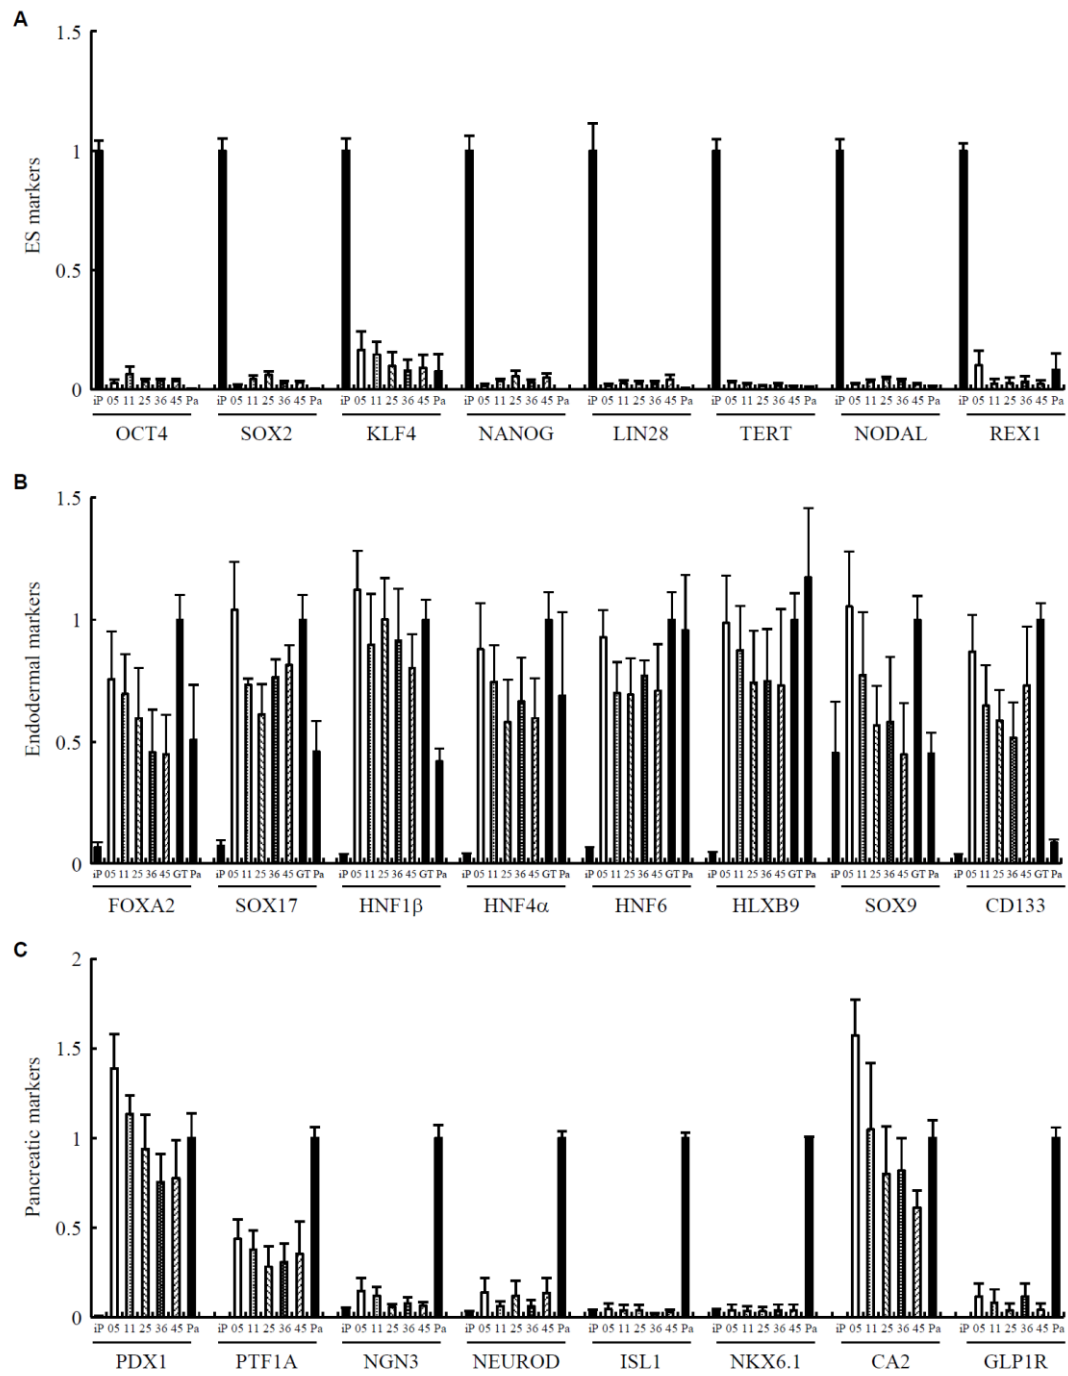

Supplemental Fig 3 Noguchi et al.

## **SUPPLEMENTAL FIGURE LEGENDS**

### **Supplemental Figure 1. Time schedules for the generation of human iTP cells from pancreatic tissue and differentiation protocol of iPS/iTP cells.**

(A) Time schedules for the induction of iTP cells. Human pancreatic tissue ( $1 \times 10^5$  cells) was electroporated with episomal plasmid vectors expressing four (OCT3/4, SOX2, KLF4, c-MYC) or six (OCT3/4, p53 shRNA, SOX2, KLF4, L-MYC, and LIN28) reprogramming factors and plated on day 0. Cells were reseeded on feeder on day 8. Cells were then cultured in ESC medium plus bFGF. (B) A schematic representation of the stepwise differentiation of iPS/iTP cells to insulin-producing cells. The cells of the definitive endoderm (DE) express SOX17; cells of the gut tube endoderm (GTE) express HNF4 $\alpha$ ; pancreatic progenitors (PP) express PDX1; and insulin-producing cells (IPC) express INSULIN, GLUT2, and GLUCOKINASE (GK).

### **Supplemental Figure 2. Evaluation of human iTP cells from pancreatic tissue**

(A) Quantitative RT-PCR analysis of PDX1, a marker of pancreatic stem/progenitor cells, in iTP and iPS cells. Thirty-eight iTP clones and two iPS clones were evaluated for PDX1 expression using quantitative RT-PCR. The data are expressed as the PDX1-to-GAPDH ratio, with the ratio of pancreatic tissue arbitrarily set to 1 ( $n = 5$ ). Error bars

represent the standard error. (B) Copy numbers of episomal plasmid vectors in iTP and iPS clones. Pancreatic tissue 6 days after electroporation of plasmid vectors expressing six reprogramming factors were analyzed (Pa-d6) as a positive control.

**Supplemental Figure 3. Quantitative RT-PCR analysis of human iTP cells for marker genes of ES and endodermal/pancreatic cells.**

(A) qRT-PCR analysis of ES cell marker genes in human iTP05, 11, 25, 36, and 45 cells. iPS cells served as a control. (B) qRT-PCR analysis of endodermal cell marker genes in human iTP05, 11, 25, 36, and 45 cells. GTE cells were used as a control. (C) qRT-PCR analysis of pancreatic cell marker genes in human iTP05, 11, 25, 36, and 45 cells. Pancreatic cells (islets >80%) cells were used as a control. iP, iPS cells; 05/ 11/ 25/ 36/ 45, iTP cells; Pa, pancreatic cells (islets >80%); GT, GTE cells. The data are expressed as the gene-to-GAPDH ratio, with that of the control cells arbitrarily set to 1 (n = 4). The error bars represent the standard error.

### Supplemental Table 1. Primers

|          | Forward                     | Reverse                     |
|----------|-----------------------------|-----------------------------|
| OCT3/4 p | gaggttgagtagaaggattgtttggtt | ccccctaaccatcacctccaccaccta |
| NANOG p  | tggttaggtgttttaattttg       | aaccaccettataaatttcaatta    |
| PDX1 p   | ctcagctgagagagaaaattggaa    | actaatcaaaaaaaaaccac        |
